# Supplementary material for: Early Changes in Nitrate Uptake and Assimilation Under Drought in Relation to Transpiration
Source: PubMed Central journal article supplement (PMC7793686; doi:10.3389/fpls.2020.602065), 2020-12-23
Supplement: Data_Sheet_1.pdf [file Data_Sheet_1.pdf]

### *Supplementary Material*

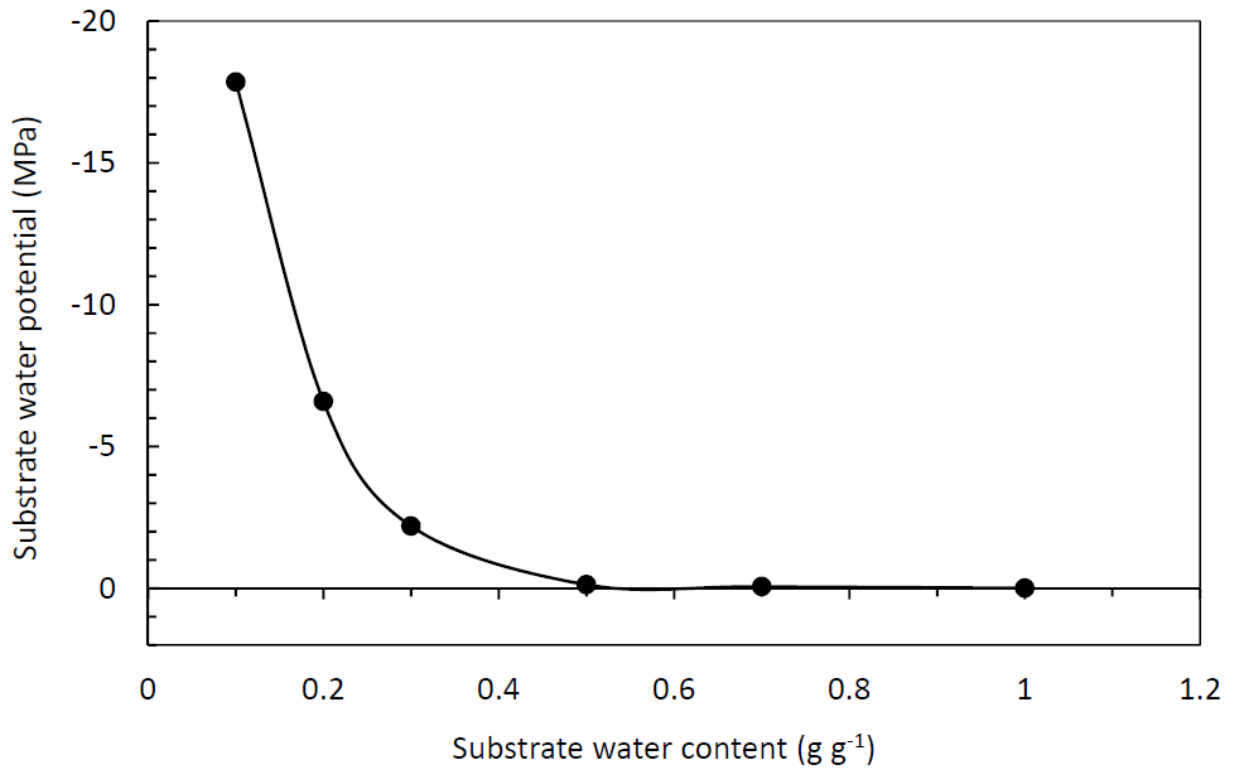

**Supplementary Figure 1.** The relationship between substrate water content and the water potential of the substrate used in all experiments.
